# Supplementary material for: The use of genetic programming in the analysis of quantitative gene expression profiles for identification of nodal status in bladder cancer
Source: PubMed Central journal article supplement (PMC1550424; doi:10.1186/1471-2407-6-159), 2006-06-16
Supplement: 1471-2407-6-159-S1.pdf [file 1471-2407-6-159-S1.pdf]

**Additional File 1**

| <b>Gene</b>             | <b>Gene Aliases</b>                                                                                 | <b>Name</b>                                                                           | <b>GenBank Accession</b>                  | <b>GeneID</b> | <b>UniGene cluster</b>    |
|-------------------------|-----------------------------------------------------------------------------------------------------|---------------------------------------------------------------------------------------|-------------------------------------------|---------------|---------------------------|
| <b><i>Apoptosis</i></b> |                                                                                                     |                                                                                       |                                           |               |                           |
| ANXA5                   | ANX5; ENX2; PP4                                                                                     | annexin A5                                                                            | <a href="#">NM_001154.2</a>               | 308           | <a href="#">Hs.480653</a> |
| BAD                     | BBC2; BCL2L8                                                                                        | BCL2-antagonist of cell death                                                         | <a href="#">NM_032989.1 / NM_004322.2</a> | 572           | <a href="#">Hs.370254</a> |
| BCL2                    | Bcl-2                                                                                               | B-cell CLL/lymphoma 2                                                                 | <a href="#">NM_000633.2</a>               | 596           | <a href="#">Hs.592350</a> |
| BCL2L1                  | BCLX; BCL2L; Bcl-X; bcl-xL; bcl-xS; BCL-XL/S; DKFZp781P2092                                         | BCL2-like 1                                                                           | <a href="#">NM_138578.1</a>               | 598           | <a href="#">Hs.516966</a> |
| CYP1A2                  | CP12; P3-450; P450(PA)                                                                              | cytochrome P450, family 1, subfamily A, polypeptide 2                                 | <a href="#">NM_000761.3</a>               | 1544          | <a href="#">Hs.1361</a>   |
| DAP                     | MGC99796                                                                                            | death-associated protein                                                              | <a href="#">NM_004394.1</a>               | 1611          | <a href="#">Hs.75189</a>  |
| PTGS2                   | COX2; COX-2; PHS-2; PGG/HS; PGHS-2; hCox-2                                                          | prostaglandin-endoperoxide synthase 2 (prostaglandin G/H synthase and cyclooxygenase) | <a href="#">NM_000963.1</a>               | 5743          | <a href="#">Hs.196384</a> |
| TGFBR2                  | AAT3; FAA3; MFS2; RIIC; TAAD2; HNPPCC6; TGFR-2; TGFbeta-RII                                         | transforming growth factor, beta receptor II (70/80kDa)                               | <a href="#">NM_003242.4</a>               | 7048          | <a href="#">Hs.604277</a> |
| TGIF                    | HPE4; MGC5066; MGC39747                                                                             | TGFB-induced factor (TALE family homeobox)                                            | <a href="#">NM_003244.2</a>               | 7050          | <a href="#">Hs.373550</a> |
| TNF                     | DIF; TNFA; TNFSF2; TNF-alpha                                                                        | tumor necrosis factor (TNF superfamily, member 2)                                     | <a href="#">NM_000594.2</a>               | 7124          | <a href="#">Hs.241570</a> |
| TNFAIP1                 | B61; EDP1                                                                                           | tumor necrosis factor, alpha-induced protein 1 (endothelial)                          | <a href="#">NM_021137.3</a>               | 7126          | <a href="#">Hs.76090</a>  |
| TNFRSF1A                | CD120a; FPF; MGC19588; TBP1; TNF-R; TNF-R-I; TNF-R55; TNFAR; TNFR1; TNFR55; TNFR60; p55; p55-R; p60 | tumor necrosis factor receptor superfamily, member 1A                                 | <a href="#">NM_001065.2</a>               | 7132          | <a href="#">Hs.279594</a> |
| TNFSF10                 | TL2; APO2L; CD253; TRAIL; Apo-2L                                                                    | tumor necrosis factor (ligand) superfamily, member 10                                 | <a href="#">NM_003810.2</a>               | 8743          | <a href="#">Hs.478275</a> |
| TRAF4                   | CART1; MLN62; RNF83                                                                                 | TNF receptor-associated factor 4                                                      | <a href="#">NM_004295.2</a>               | 9618          | <a href="#">Hs.8375</a>   |

| <b>Gene</b>              | <b>Gene Aliases</b>             | <b>Name</b>                                                                     | <b>GenBank Accession</b>                  | <b>GeneID</b> | <b>UniGene cluster</b>    |
|--------------------------|---------------------------------|---------------------------------------------------------------------------------|-------------------------------------------|---------------|---------------------------|
| <b><i>Cell Cycle</i></b> |                                 |                                                                                 |                                           |               |                           |
| CCNA2                    | CCN1; CCNA                      | cyclin A2                                                                       | <a href="#">NM_001237.2</a>               | 890           | <a href="#">Hs.58974</a>  |
| CCND3                    |                                 | cyclin D3                                                                       | <a href="#">NM_001760.2</a>               | 896           | <a href="#">Hs.534307</a> |
| CCNE1                    | CCNE                            | cyclin E1                                                                       | <a href="#">NM_001238.1 / NM_057182.1</a> | 898           | <a href="#">Hs.244723</a> |
| CCNG1                    | CCNG                            | cyclin G1                                                                       | <a href="#">NM_004060.3 / NM_199246.1</a> | 900           | <a href="#">Hs.79101</a>  |
| CDC2                     | CDK1; MGC111195; DKFZp686L20222 | cell division cycle 2, G1 to S and G2 to M                                      | <a href="#">NM_001786.2</a>               | 983           | <a href="#">Hs.334562</a> |
| CDC25C                   | CDC25                           | cell division cycle 25C                                                         | <a href="#">NM_001790.2 / NM_022809.1</a> | 995           | <a href="#">Hs.656</a>    |
| CDK7                     | CAK1; STK1; CDKN7; p39MO15      | cyclin-dependent kinase 7 (MO15 homolog, Xenopus laevis, cdk-activating kinase) | <a href="#">NM_001799.2</a>               | 1022          | <a href="#">Hs.184298</a> |
| CDK8                     | K35; MGC126074; MGC126075       | cyclin-dependent kinase 8                                                       | <a href="#">NM_001260.1</a>               | 1024          | <a href="#">Hs.382306</a> |
| PCNA                     | MGC8367                         | proliferating cell nuclear antigen                                              | <a href="#">NM_002592.2 / NM_182649.1</a> | 5111          | <a href="#">Hs.147433</a> |

| Gene                   | Gene Aliases                                                           | Name                                                                        | GenBank Accession           | GeneID | UniGene cluster           |
|------------------------|------------------------------------------------------------------------|-----------------------------------------------------------------------------|-----------------------------|--------|---------------------------|
| <b>Gene Regulation</b> |                                                                        |                                                                             |                             |        |                           |
| FOS                    | c-fos                                                                  | v-fos FBJ murine osteosarcoma viral oncogene homolog                        | <a href="#">NM_005252.2</a> | 2353   | <a href="#">Hs.25647</a>  |
| FOSL1                  | FRA1; fra-1                                                            | FOS-like antigen 1                                                          | <a href="#">NM_005438.2</a> | 8061   | <a href="#">Hs.283565</a> |
| HSF1                   | HSTF1                                                                  | heat shock transcription factor 1                                           | <a href="#">NM_005526.1</a> | 3297   | <a href="#">Hs.530227</a> |
| MAP3K14                | HS; NIK; HSNIK; FTDCR1B                                                | mitogen-activated protein kinase kinase kinase 14                           | <a href="#">NM_003954.1</a> | 9020   | <a href="#">Hs.404183</a> |
| SP1                    |                                                                        | Sp1 transcription factor                                                    | <a href="#">NM_138473.2</a> | 6667   | <a href="#">Hs.620754</a> |
| JUN                    | AP1                                                                    | v-jun sarcoma virus 17 oncogene homolog (avian)                             | <a href="#">NM_002228.3</a> | 3725   | <a href="#">Hs.525704</a> |
| JUNB                   |                                                                        | jun B proto-oncogene                                                        | <a href="#">NM_002229.2</a> | 3726   | <a href="#">Hs.25292</a>  |
| MAX                    | orf1; MGC10775; MGC11225; MGC18164; MGC34679; MGC36767                 | MYC associated factor X                                                     | <a href="#">NM_145113.1</a> | 4149   | <a href="#">Hs.285354</a> |
| MYC                    | c-Myc                                                                  | v-myc myelocytomatosis viral oncogene homolog (avian)                       | <a href="#">NM_002467.3</a> | 4609   | <a href="#">Hs.202453</a> |
| NFKB1                  | KBF1; EBP-1; MGC54151; NFKB-p50; NFKB-p105; NF-kappa-B; DKFZp686C01211 | nuclear factor of kappa light polypeptide gene enhancer in B-cells 1 (p105) | <a href="#">NM_003998.2</a> | 4790   | <a href="#">Hs.431926</a> |

| Gene                                 | Gene Aliases                                                                                    | Name                                                                | GenBank Accession                                         | GeneID | UniGene cluster           |
|--------------------------------------|-------------------------------------------------------------------------------------------------|---------------------------------------------------------------------|-----------------------------------------------------------|--------|---------------------------|
| <b><i>Apoptosis + Cell Cycle</i></b> |                                                                                                 |                                                                     |                                                           |        |                           |
| RB                                   | RB; OSRC                                                                                        | retinoblastoma 1 (including osteosarcoma)                           | <a href="#">NM_000321.1</a>                               | 5925   | <a href="#">Hs.408528</a> |
| RBL2                                 | Rb2; P130; FLJ26459                                                                             | retinoblastoma-like 2 (p130)                                        | <a href="#">NM_005611.2</a>                               | 5934   | <a href="#">Hs.513609</a> |
| CDKN1A                               | P21; CIP1; SDI1; WAF1; CAP20; CDKN1; MDA-6; p21CIP1                                             | cyclin-dependent kinase inhibitor 1A (p21, Cip1)                    | <a href="#">NM_000389.2</a> / <a href="#">NM_078467.1</a> | 1026   | <a href="#">Hs.370771</a> |
| CDKN1B                               | KIP1; CDKN4; P27KIP1                                                                            | cyclin-dependent kinase inhibitor 1B (p27, Kip1)                    | <a href="#">NM_004064.2</a>                               | 1027   | <a href="#">Hs.238990</a> |
| CDKN2A                               | ARF; MLM; p14; p16; p19; CMM2; INK4; MTS1; TP16; CDK4I; CDKN2; INK4a; p14ARF; p16INK4; p16INK4a | cyclin-dependent kinase inhibitor 2A (melanoma, p16, inhibits CDK4) | <a href="#">NM_000077.3</a>                               | 1029   | <a href="#">Hs.512599</a> |
| CDKN2C                               | p18; INK4C; p18-INK4C                                                                           | cyclin-dependent kinase inhibitor 2C (p18, inhibits CDK4)           | <a href="#">NM_001262.2</a> / <a href="#">NM_078626.1</a> | 1031   | <a href="#">Hs.525324</a> |
| GAPDH                                | G3PD; GAPD; MGC88685                                                                            | glyceraldehyde-3-phosphate dehydrogenase                            | <a href="#">NM_002046.2</a>                               | 2597   | <a href="#">Hs.592355</a> |
| MXD1                                 | MAD; MAD1; MGC104659                                                                            | MAX dimerization protein 1                                          | <a href="#">NM_002357.2</a>                               | 4084   | <a href="#">Hs.468908</a> |
| TP53                                 | p53; LFS1; TRP53                                                                                | tumor protein p53 (Li-Fraumeni syndrome)                            | <a href="#">NM_000546.2</a>                               | 7157   | <a href="#">Hs.408312</a> |

| Gene                                                   | Gene Aliases                                | Name                                                                      | GenBank Accession           | GeneID | UniGene cluster           |
|--------------------------------------------------------|---------------------------------------------|---------------------------------------------------------------------------|-----------------------------|--------|---------------------------|
| <b><i>Apoptosis + Cell Cycle + Gene Regulation</i></b> |                                             |                                                                           |                             |        |                           |
| E2F1                                                   | RBP3; E2F-1; RBBP3                          | E2F transcription factor 1                                                | <a href="#">NM_005225.1</a> | 1869   | <a href="#">Hs.516986</a> |
| E2F2                                                   | E2F-2                                       | E2F transcription factor 2                                                | <a href="#">NM_004091.2</a> | 1870   | <a href="#">Hs.194333</a> |
| E2F4                                                   | E2F-4                                       | E2F transcription factor 4, p107/p130-binding                             | <a href="#">NM_001950.3</a> | 1874   | <a href="#">Hs.108371</a> |
| E2F5                                                   | E2F-5                                       | E2F transcription factor 5, p130-binding                                  | <a href="#">NM_001951.2</a> | 1875   | <a href="#">Hs.445758</a> |
| <b><i>Anti-oxidation</i></b>                           |                                             |                                                                           |                             |        |                           |
| GSTM3                                                  | GST5; GSTB; GTM3; GSTM3-3; MGC3310; MGC3704 | glutathione S-transferase M3 (brain)                                      | <a href="#">NM_00849.3</a>  | 2947   | <a href="#">Hs.2006</a>   |
| GSTP1                                                  | PI; DFN7; GST3; FAEES3                      | glutathione S-transferase pi                                              | <a href="#">NM_000852.2</a> | 2950   | <a href="#">Hs.523836</a> |
| GSTT1                                                  |                                             | glutathione S-transferase theta 1                                         | <a href="#">NM_000853.1</a> | 2952   | <a href="#">Hs.268573</a> |
| SOD1                                                   | ALS; SOD; ALS1; IPOA; homodimer             | superoxide dismutase 1, soluble (amyotrophic lateral sclerosis 1 (adult)) | <a href="#">NM_000454.4</a> | 6647   | <a href="#">Hs.443914</a> |

| Gene                          | Gene Aliases                                                     | Name                                                                                                           | GenBank Accession                                            | GeneID | UniGene cluster           |
|-------------------------------|------------------------------------------------------------------|----------------------------------------------------------------------------------------------------------------|--------------------------------------------------------------|--------|---------------------------|
| <b>Cell Growth Regulation</b> |                                                                  |                                                                                                                |                                                              |        |                           |
| IGF1                          | IGFI                                                             | insulin-like growth factor 1 (somatomedin C)                                                                   | <a href="#">NM_000618.2</a>                                  | 3479   | <a href="#">Hs.160562</a> |
| IGF2R                         | MPRI; CD222; CIMPR; M6P-R                                        | insulin-like growth factor 2 receptor                                                                          | <a href="#">NM_000876.1</a>                                  | 3482   | <a href="#">Hs.487062</a> |
| PDGFB                         | SIS; SSV; PDGF2; c-sis; FLJ12858                                 | platelet-derived growth factor beta polypeptide (simian sarcoma viral (v-sis) oncogene homolog)                | <a href="#">NM_002608.1</a> / <a href="#">NM_033016.1</a>    | 5155   | <a href="#">Hs.1976</a>   |
| PDGFRL                        | PDGRL; PRLTS                                                     | platelet-derived growth factor receptor-like                                                                   | <a href="#">NM_006207.1</a>                                  | 5157   | <a href="#">Hs.458573</a> |
| <b>Signal Transduction</b>    |                                                                  |                                                                                                                |                                                              |        |                           |
| ERBB2                         | NEU; NGL; HER2; TKR1; HER-2; c-erb B2; HER-2/neu                 | v-erb-b2 erythroblastic leukemia viral oncogene homolog 2, neuro/glioblastoma derived oncogene homolog (avian) | <a href="#">NM_004448.2</a> / <a href="#">NM_001005862.1</a> | 2064   | <a href="#">Hs.446352</a> |
| MAPK8                         | JNK; JNK1; PRKM8; SAPK1; JNK1A2; JNK21B1/2                       | mitogen-activated protein kinase 8                                                                             | <a href="#">NM_139049.1</a> / <a href="#">NM_002750.2</a>    | 5599   | <a href="#">Hs.138211</a> |
| MAPK9                         | JNK2; JNK2A; JNK2B; PRKM9; JNK-55; JNK2BETA; p54aSAPK; JNK2ALPHA | mitogen-activated protein kinase 9                                                                             | <a href="#">NM_139069.1</a> / <a href="#">NM_139070.1</a>    | 5601   | <a href="#">Hs.484371</a> |
| MAPK12                        | ERK3; ERK6; SAPK3; PRKM12; SAPK-3; P38GAMMA                      | mitogen-activated protein kinase 12                                                                            | <a href="#">NM_002969.3</a>                                  | 6300   | <a href="#">Hs.432642</a> |
| MAP2K6                        | MEK6; MKK6; MAPKK6; PRKMK6; SAPKK3                               | mitogen-activated protein kinase kinase 6                                                                      | <a href="#">NM_002758.2</a> / <a href="#">NM_031988.1</a>    | 5608   | <a href="#">Hs.463978</a> |
| STAT3                         | APRF; FLJ20882; MGC16063                                         | signal transducer and activator of transcription 3 (acute-phase response factor)                               | <a href="#">NM_139276.2</a>                                  | 6774   | <a href="#">Hs.463059</a> |
| LYN                           | JTK8; FLJ26625                                                   | v-yes-1 Yamaguchi sarcoma viral related oncogene homolog                                                       | <a href="#">NM_002350.1</a>                                  | 4067   | <a href="#">Hs.491767</a> |

| <b>Gene</b>                  | <b>Gene Aliases</b>               | <b>Name</b>                                                         | <b>GenBank Accession</b>                  | <b>GeneID</b> | <b>UniGene cluster</b>    |
|------------------------------|-----------------------------------|---------------------------------------------------------------------|-------------------------------------------|---------------|---------------------------|
| <b><i>Angiogenesis</i></b>   |                                   |                                                                     |                                           |               |                           |
| FGF5                         | HBGF-5; Smag-82                   | fibroblast growth factor 5                                          | <a href="#">NM_004464.3 / NM_033143.2</a> | 2250          | <a href="#">Hs.37055</a>  |
| FGFR4                        | TKF; JTK2; CD334; MGC20292        | fibroblast growth factor receptor 4                                 | <a href="#">NM_002011.3</a>               | 2264          | <a href="#">Hs.165950</a> |
| VEGF                         | VPF; VEGFA; MGC70609              | vascular endothelial growth factor                                  | <a href="#">NM_003376.4</a>               | 7422          | <a href="#">Hs.73793</a>  |
| KDR                          | FLK1; CD309; VEGFR; VEGFR2        | kinase insert domain receptor (a type III receptor tyrosine kinase) | <a href="#">NM_002253.1</a>               | 3791          | <a href="#">Hs.479756</a> |
| <b><i>Invasion</i></b>       |                                   |                                                                     |                                           |               |                           |
| BMP6                         | VGR; VGR1                         | bone morphogenetic protein 6                                        | <a href="#">NM_001718.2</a>               | 654           | <a href="#">Hs.285671</a> |
| CDH3                         | CDHP; HJMD; PCAD                  | cadherin 3, type 1, P-cadherin (placental)                          | <a href="#">NM_001793.3</a>               | 1001          | <a href="#">Hs.554598</a> |
| ICAM1                        | BB2; CD54; P3.58                  | intercellular adhesion molecule 1 (CD54), human rhinovirus receptor | <a href="#">NM_000201.1</a>               | 3383          | <a href="#">Hs.515126</a> |
| MMP16                        | MMP-X2; MT-MMP2; MT-MMP3; MT3-MMP | matrix metalloproteinase 16 (membrane-inserted)                     | <a href="#">NM_005941.2 / NM_022564.1</a> | 4325          | <a href="#">Hs.546267</a> |
| TIMP2                        | CSC-21K                           | TIMP metalloproteinase inhibitor 2                                  | <a href="#">NM_003255.4</a>               | 7077          | <a href="#">Hs.104839</a> |
| <b><i>Reference Gene</i></b> |                                   |                                                                     |                                           |               |                           |
| ACTB                         | PS1TP5BP1                         | actin, beta                                                         | <a href="#">NM_001101.2</a>               | 60            | <a href="#">Hs.520640</a> |

### **Detailed list of genes investigated by StaRT-PCR™**

The entire study analyzed 70 candidate markers within eight partially overlapping pathways involved in carcinogenesis. The above tables list comprehensive information on each gene based on the records maintained by the [United States National Library of Medicine](#). GenBank accession and GeneID numbers are provided through [Entrez Gene](#) and UniGene cluster numbers are provided through [UniGene](#). All hyperlinks on this document are current as of June 08, 2006.
