# Supplementary material for: The use of genetic programming in the analysis of quantitative gene expression profiles for identification of nodal status in bladder cancer
Source: PubMed Central journal article supplement (PMC1550424; doi:10.1186/1471-2407-6-159), 2006-06-16
Supplement: 1471-2407-6-159-S3.pdf [file 1471-2407-6-159-S3.pdf]

The use of genetic programming in the analysis of quantitative gene expression profiles for identification of nodal status in bladder cancer

Mitra AP, Almal AA, George B, Fry DW, Lenehan PF, Pagliarulo V, Cote RJ, Datar RH, Worzel WP

### **Additional File 3**

| <b>Rule number</b> | <b>Classifier Rule</b>                                        |
|--------------------|---------------------------------------------------------------|
| 1                  | $(MAP2K6 / KDR) \times (1.0 - (MAP2K6 / ICAM1)) > .71$        |
| 2                  | $MAP2K6 \times ((ICAM1 - KDR) / (ICAM1 \times KDR)) > .705$   |
| 3                  | $MAP2K6 \times ((ICAM1 - KDR) / (ICAM1 \times KDR)) > .705$   |
| 4                  | $(MAP2K6 / KDR) - \exp(KDR) - (MAP2K6 / ICAM1) > -.294$       |
| 5                  | $(MAP2K6 / KDR) \times (1.0 - (MAP2K6 / ICAM1)) > .71$        |
| 6                  | $ICAM1 / (MAP2K6 - KDR \times \exp(ICAM1)) > 4.092$           |
| 7                  | $(MAP2K6 / KDR) \times (1.0 - (MAP2K6 / ICAM1)) > .71$        |
| 8                  | $(MAP2K6 / KDR) - (MAP2K6 / (ICAM1 + \exp(ICAM1))) > .705$    |
| 9                  | $MAP2K6 \times ((ICAM1 - KDR) / (ICAM1 \times KDR)) > .69$    |
| 10                 | $(MAP2K6 / KDR) - (MAP2K6 / (ICAM1 \times \exp(KDR))) > .705$ |
| 11                 | $(MAP2K6 / KDR) - (MAP2K6 / (ICAM1 + \exp(ICAM1))) > .886$    |

**Meta-rule for node positive patients using the three most frequently used genes, viz. *KDR*, *MAP2K6* and *ICAM1*.**

Note that rules 1, 5 and 7 feature the same rule.
