# Supplementary material for: The use of genetic programming in the analysis of quantitative gene expression profiles for identification of nodal status in bladder cancer
Source: PubMed Central journal article supplement (PMC1550424; doi:10.1186/1471-2407-6-159), 2006-06-16
Supplement: 1471-2407-6-159-S4.pdf [file 1471-2407-6-159-S4.pdf]

#### **Additional File 4**

|                                                          | <b>Pathologically Node Positive</b> | <b>Pathologically Node Negative</b> |
|----------------------------------------------------------|-------------------------------------|-------------------------------------|
| <b>Predicted Node Positive by GP using a single rule</b> | 7 <sup>§</sup>                      | 0                                   |
| <b>Predicted Node Negative by GP using a single rule</b> | 3                                   | 21 <sup>†</sup>                     |

§ True positive subjects

† True negative subjects

Accuracy: 90%  
Sensitivity: 70%  
Specificity: 100%  
Positive Predictive Value: 100%  
Negative Predictive Value: 88%

**Performance of the rule “ $(MAP2K6 / KDR) \times (1.0 - (MAP2K6 / ICAM1)) > .71$ ” selected from the meta-rule generated using the three most frequently used genes, viz. *KDR*, *MAP2K6* and *ICAM1*, on the validation set and result metrics.**
