# Supplementary material for: The use of genetic programming in the analysis of quantitative gene expression profiles for identification of nodal status in bladder cancer
Source: PubMed Central journal article supplement (PMC1550424; doi:10.1186/1471-2407-6-159), 2006-06-16
Supplement: 1471-2407-6-159-S5.pdf [file 1471-2407-6-159-S5.pdf]

**Additional File 5**

| Pathological stage |                 | Number of subjects |                | Number of validation set subjects correctly predicted by GP |                                      |                                |
|--------------------|-----------------|--------------------|----------------|-------------------------------------------------------------|--------------------------------------|--------------------------------|
| Lymph node         | Tumor           | Training set       | Validation set | Meta-rule using 70 genes                                    | Meta-rule using 3 genes <sup>§</sup> | Using single rule <sup>†</sup> |
| Node positive      | pTa             | 0                  | 0              | n/a                                                         | n/a                                  | n/a                            |
|                    | pT1             | 2                  | 1              | 1                                                           | 1                                    | 1                              |
|                    | pT2             | 0                  | 0              | n/a                                                         | n/a                                  | n/a                            |
|                    | pT3             | 7                  | 7              | 3                                                           | 4                                    | 4                              |
|                    | pT4             | 2                  | 2              | 2                                                           | 2                                    | 2                              |
| Node negative      | Normal controls | 3                  | 2              | 2                                                           | 2                                    | 2                              |
|                    | pTa             | 3                  | 7              | 7                                                           | 7                                    | 7                              |
|                    | pT1             | 6                  | 4              | 4                                                           | 4                                    | 4                              |
|                    | pT2             | 4                  | 4              | 4                                                           | 2                                    | 4                              |
|                    | pT3             | 5                  | 3              | 2                                                           | 3                                    | 3                              |
|                    | pT4             | 2                  | 1              | 0                                                           | 0                                    | 1                              |

**Table 5-1: Stage-wise performance of the GP runs on the validation set.**

| Subject | Pathological stage |            | Prediction of nodal stage of validation set subjects by GP |                                      |                                |
|---------|--------------------|------------|------------------------------------------------------------|--------------------------------------|--------------------------------|
|         | Tumor              | Lymph node | Meta-rule using 70 genes                                   | Meta-rule using 3 genes <sup>§</sup> | Using single rule <sup>†</sup> |
| VS1     | pTa                | NN         | ✓                                                          | ✓                                    | ✓                              |
| VS2     | pTa                | NN         | ✓                                                          | ✓                                    | ✓                              |
| VS3     | pTa                | NN         | ✓                                                          | ✓                                    | ✓                              |
| VS4     | Normal             | NN         | ✓                                                          | ✓                                    | ✓                              |
| VS5     | pTa                | NN         | ✓                                                          | ✓                                    | ✓                              |
| VS6     | pTa                | NN         | ✓                                                          | ✓                                    | ✓                              |
| VS7     | pTa                | NN         | ✓                                                          | ✓                                    | ✓                              |
| VS8     | pT2                | NN         | ✓                                                          | ✗                                    | ✓                              |
| VS9     | pT2                | NN         | ✓                                                          | ✓                                    | ✓                              |
| VS10    | pT1                | NN         | ✓                                                          | ✓                                    | ✓                              |
| VS11    | pT1                | NN         | ✓                                                          | ✓                                    | ✓                              |
| VS12    | pT1                | NP         | ✓                                                          | ✓                                    | ✓                              |
| VS13    | Normal             | NN         | ✓                                                          | ✓                                    | ✓                              |
| VS14    | pT1                | NN         | ✓                                                          | ✓                                    | ✓                              |
| VS15    | pT1                | NN         | ✓                                                          | ✓                                    | ✓                              |
| VS16    | pT3                | NP         | ✗                                                          | ✓                                    | ✓                              |
| VS17    | pT4                | NN         | ✗                                                          | ✗                                    | ✓                              |
| VS18    | pT4                | NP         | ✓                                                          | ✓                                    | ✓                              |
| VS19    | pT3                | NN         | ✓                                                          | ✓                                    | ✓                              |
| VS20    | pT3                | NN         | ✓                                                          | ✓                                    | ✓                              |
| VS21    | pT3                | NP         | ✓                                                          | ✓                                    | ✓                              |
| VS22    | pT3                | NP         | ✗                                                          | ✗                                    | ✗                              |
| VS23    | pT3                | NN         | ✗                                                          | ✓                                    | ✓                              |
| VS24    | pT2                | NN         | ✓                                                          | ✓                                    | ✓                              |
| VS25    | pT3                | NP         | ✗                                                          | ✗                                    | ✗                              |
| VS26    | pT3                | NP         | ✓                                                          | ✓                                    | ✓                              |
| VS27    | pT3                | NP         | ✓                                                          | ✓                                    | ✓                              |
| VS28    | pTa                | NN         | ✓                                                          | ✓                                    | ✓                              |
| VS29    | pT2                | NN         | ✓                                                          | ✗                                    | ✓                              |
| VS30    | pT3                | NP         | ✗                                                          | ✗                                    | ✗                              |
| VS31    | pT4                | NP         | ✓                                                          | ✓                                    | ✓                              |

**Table 5-2: Case-wise performance of the GP runs on the validation set.**

The use of genetic programming in the analysis of quantitative gene expression profiles for identification of nodal status in bladder cancer

Mitra AP, Almal AA, George B, Fry DW, Lenehan PF, Pagliarulo V, Cote RJ, Datar RH, Worzel WP

**Key:**

§ Meta-rule generated using the three most frequently used genes, viz. *KDR*, *MAP2K6* and *ICAM1*

† Rule “ $(MAP2K6 / KDR) \times (1.0 - (MAP2K6 / ICAM1)) > .71$ ” selected from the meta-rule generated using the three most frequently used genes, viz. *KDR*, *MAP2K6* and *ICAM1*

✓ Correct prediction of pathological nodal status

✗ Incorrect prediction of pathological nodal status
